**Title:** iELVis: An open source MATLAB toolbox for localizing and visualizing human intracranial electrode data

**Authors:**

Groppe, David M. (1,2), Bickel, Stephan (3,4), Dykstra, Andrew R. (5), Wang, Xiuyuan (6,7), Mégevand, Pierre (2,8), Mercier, Manuel R. (3,9,10), Lado, Fred A. (3,10), Mehta, Ashesh D. (2)\*, Honey, Christopher J. (1)\*

\*=equal senior authorship

1. Department of Psychology, University of Toronto, Toronto, ON M5S 5G3, Canada
2. Department of Neurosurgery, Hofstra Northwell School of Medicine, and Feinstein Institute for Medical Research, Manhasset, NY 11030, USA
3. Department of Neurology, Montefiore Medical Center, Bronx, NY 10467, USA
4. Department of Neurology, Stanford University, Stanford, CA 94305, USA
5. Department of Neurology, Ruprecht-Karls-Universität Heidelberg, 69120 Heidelberg, Germany
6. Department of Neurology, New York University School of Medicine, New York, NY 10016, USA
7. Department of Radiology, New York University School of Medicine, New York, NY 10016, USA
8. Division of Neurology, Department of Clinical Neuroscience, Hôpitaux Universitaires de Genève, 1211 Geneva, Switzerland
9. Centre de Recherche Cerveau et Cognition (CerCo), CNRS, UMR5549, Pavillon Baudot CHU Purpan, BP 25202, 31052 Toulouse Cedex, France; Université Paul Sabatier, Toulouse, France
10. Department of Neuroscience, Albert Einstein College of Medicine, Bronx, NY 10461, USA

## **ABSTRACT**

### **Background**

Intracranial electrical recordings (iEEG) and brain stimulation (iEBS) are invaluable human neuroscience methodologies. However, much of the value of such data is unrealized as many labs lack tools for precisely localizing electrodes relative to anatomy and to other functional measures. To remedy this, we have developed a MATLAB toolbox for intracranial electrode localization and visualization, iELVis.

### **New Method**

The iELVis pipeline extends existing tools (Biolmage Suite, FSL, and FreeSurfer) for localizing electrode locations in CT or MR scans. Once electrode locations are identified in postimplant neuroimaging, iELVis implements methods for correcting electrode locations for postimplant brain shift with millimeter-scale accuracy. iELVis then supports interactive visualization on 3D surfaces or in 2D slices alongside functional neuroimaging data. iELVis also localizes electrodes relative to FreeSurfer-based atlases and can combine data across subjects via the FreeSurfer average brain.

### **Results**

It takes 30-60 minutes of user time and 12-24 hours of computer time to localize and visualize electrodes from one brain. We demonstrate iELVis's co-registered visualization functionality by overlaying concordant results from three methods for mapping primary hand somatosensory cortex (iEEG, iEBS, and fMRI).

### **Comparison with Existing Methods**

iELVis standardizes existing approaches within a common pipeline, while advancing and combining the state of the art techniques in (i) brain-shift correction, (ii) atlas functionality, and (iii) multimodal visualization for human intracranial data.

### **Conclusions**

iELVis promises to speed and enhance the robustness of intracranial electrode research. The software and extensive tutorial materials are freely available as part of the EpiSurg software project: <https://github.com/episurg/episurg>

# 1. INTRODUCTION

Since the early decades of the 20<sup>th</sup> century, recording the intracranial electroencephalogram (iEEG) and performing intracranial electrical brain stimulation (iEBS) have been invaluable clinical tools for mapping pathological and functional brain regions in patients being evaluated for brain surgery (Penfield & Jasper, 1954). In addition to their clinical utility, these invasive measures have provided a unique window on human brain function for both clinical and basic research. Indeed, in recent years there has been an explosion of interest in iEEG and iEBS research for several reasons. Firstly, iEEG has proven to be a fine-grained measure of mean local firing rates (Crone, Korzeniewska, & Franaszczuk, 2011; Miller, Sorensen, Ojemann, & Nijs, 2009) as well as local synaptic potentials (e.g., Golumbic et al., 2013). Secondly, there is mounting evidence that iEBS can improve (Suthana et al., 2012) or manipulate (Parvizi et al., 2012; Mégevand et al., 2014) brain function with great precision. Finally, a growing number of public databases of iEEG data (e.g., [www.ieeg.org](http://www.ieeg.org), [www.epilepsiae.eu](http://www.epilepsiae.eu)) are increasing access to these rare data.

Despite the growing popularity iEEG and iEBS research, many researchers run into technical challenges when trying to analyze these data. These include: [1] precisely identifying the anatomical location of electrodes, [2] correcting for postimplant brain deformities (i.e., “brain shift”) so that postimplant data can be coregistered to preimplant neuroimaging, [3] effectively visualizing electrode data in a way that communicates their locations relative to other neural measures (e.g., MRI, fMRI), and [4] mapping idiosyncratic electrode montages into a common space for “group analyses” that combine data from multiple patients. Although some excellent public software has been produced that solves some of these issues (Table 1), there is not yet a well-developed, scriptable, public software package for solving all of them. Consequently, iEEG and iEBS research groups are currently forced to develop lab-specific solutions from existing packages and their own custom code. This is an inefficient and error prone method to solving these technical challenges that also makes it difficult to compare findings across research groups.

To remedy this problem, we have pooled the resources of five different iEEG/iEBS research groups to develop a freely-available, open source software toolbox and processing pipeline that can assist researchers in localizing electrodes, correcting for brain shift, overlaying electrode locations with neuroimaging data, and visualizing their locations relative to individual anatomy and group-level templates. The toolbox, called iELVis (Intracranial ELectrode VISualization), consists of MATLAB functions with a handful of Bash scripts for neuroimaging coregistration and overlay creation. iELVis relies on FreeSurfer ([www.freesurfer.net](http://www.freesurfer.net)) for MRI segmentation and for mapping to the FreeSurfer average brain for group analyses. In addition, iELVis relies on BioImage Suite ([www.bioimagesuite.org](http://www.bioimagesuite.org); Papademetris, Jackowski, & Rajeevan, 2011) for manually tagging electrode locations in postimplant CT or MRI scans. In this

paper we present the main features of iELVis and the basic iELVis electrode localization workflow. More extensive tutorial materials are available on the toolbox wiki, <http://episurg.pbworks.com>, and the toolbox can be downloaded from <https://github.com/episurg/EpiSurg>.

## 2. ELECTRODE LOCALIZATION

The first step in electrode localization is to automatically segment a patient's preimplant T1 MRI using FreeSurfer. The segmentation assigns each brain voxel to one of 46 regions such as the hippocampus, amygdala, cerebral cortex, or white matter (Figure 1: A left). The segmentation also estimates the pial surface for each cerebral hemisphere and smooths over the sulci in the pial surface to derive a proxy for the leptomeningeal surface<sup>1</sup> (Figure 1: A middle & right). The leptomeningeal surface (Schaer et al., 2008) is created because it is useful for identifying subdural electrode locations since subdural electrodes traverse sulci. Finally, the individual's brain is mapped to the FreeSurfer average brain (see subsequent section). This procedure requires up to 24 hours on a conventional workstation. Manual intervention is rarely necessary. The exceptions are patients with gross brain abnormalities such as tumors and lobectomies for whom the automatic segmentation may fail around the abnormal regions, and the medial wall of the anterior medial temporal lobe, which tends to be underestimated.

Once FreeSurfer has completed processing the MRI, a postimplant CT or MRI is rigidly aligned to the preimplant MRI via an affine transform with six degrees of freedom (Figure 1: B). iELVis provides Bash scripts for performing this coregistration using the *flirt* tool (Jenkinson & Smith, 2001; Jenkinson, Bannister, Brady, & Smith, 2002) from the Oxford Centre for Functional MRI of the Brain Software Library (FSL: [www.fmrib.ox.ac.uk/fsl](http://www.fmrib.ox.ac.uk/fsl)) or using FreeSurfer's *bbregister* (Greve & Fischl, 2009). While *flirt* attempts to align the entire volume, *bbregister* aligns image boundaries. Another practical difference is that the results of *bbregister* are easy to manually edit using FreeSurfer's *tkregister2* graphical user interface (GUI). Accuracy of the CT-MRI coregistration can be readily visually verified by the alignment of the skull in both volumes. MRI-MRI coregistration accuracy is even easier to visually confirm. In our testing, both *flirt* and *bbregister* typically give very similar results with no need for manual intervention. However, occasionally when one method fails, the other will typically succeed.

After the postimplant scan has been aligned to the preimplant MRI, the postimplant scan (in the preimplant MRI space) is imported into BiImage Suite's Electrode Editor to manually identify electrode locations (Figure 1: C-D).

---

<sup>1</sup> In previous papers (Dykstra et al., 2011, Yang, Wang, et al., 2012) the smoothed pial surface was called the "dural surface." We think "leptomeningeal surface" is more accurate given that subdural electrodes lie below the dural membrane.

Depending on the number of electrodes, a user can typically tag all electrodes in 30 to 60 minutes. Next, electrode coordinates are saved to a Biolum Suite *mgrid* file which can be imported into MATLAB and visualized over the pial surface using iELVis functions (Figure 1: E). Other neuroimaging interfaces (e.g., FreeSurfer's *tkmedit*) could be used in lieu of Biolum Suite for identifying electrode coordinates if users record electrode locations in a text file compatible with iELVis conventions.

Finally, the subdural electrodes are projected out to the leptomeningeal (i.e., the smoothed pial) surface to correct for brain shift (Figure 1: F). Brain shift is caused by factors such as loss of cerebrospinal fluid, swelling, and the displacement of the brain by electrodes (Hastreiter et al., 2004). This deformity is typically most severe near a craniotomy and can be more than 1 cm (Dalal et al., 2008; Hill, Smith, & Simmons, 2000). In contrast, implants requiring only burr holes typically produce minimal brain shift (Sweet, Hdeib, Sloan, & Miller, 2013). iELVis includes two algorithms for brain shift correction. The first of these, devised by Dykstra, Chan and colleagues (Dykstra et al., 2011), projects each subdural electrode to the leptomeningeal surface using an iterative optimization algorithm that attempts to minimize the change in each electrode's location and the distance with its four closest neighbors. Based on comparisons with intraoperative photographs of electrode locations in five patients, the Dykstra algorithm appears to localize electrodes under the craniotomy with median (IQR) error of 3 (2.39) mm or less (ibid.). Since electrodes near the craniotomy are typically most affected by brain shift, accuracy is likely even better for strips of electrodes that are inserted far from or without craniotomies. The second algorithm was created by Yang, Wang and colleagues (Yang et al., 2012) and projects grids of electrodes to the leptomeningeal surface via an inverse gnomonic projection. More specifically, the algorithm approximates the leptomeningeal surface under each grid as part of a larger sphere and iteratively adjusts the projection of the grid plane onto the sphere to minimize the difference between the projected and known electrode geometry. Subdural strips of electrodes are simply assigned to the location of the nearest point on the leptomeningeal surface. When the results of this algorithm were compared with electrode locations in intraoperative photographs in eight patients, the median (IQR) error of the Yang-Wang method was 0.74 (0.75) mm for sub-craniotomy electrodes (Yang et al., 2012). Once the subdural electrodes have been corrected for brain shift, several diagnostic plots are produced to help identify potential errors (Figure 2).

Note that neither algorithm corrects the location of penetrating depth electrodes for brain shift. Since depth electrodes typically target medial structures (e.g. the hippocampus) that are minimally affected by brain shift, this is likely not a serious shortcoming. Moreover, depth-only implants (i.e., stereotactic EEG) generally produce negligible brain shift as a craniotomy is not performed (Gonzalez-Martinez et al., 2014; Sweet, Hdeib, Sloan, & Miller, 2013).

### 3. MAPPING ELECTRODES TO AN AVERAGE BRAIN

iELVis supports mapping electrodes to the FreeSurfer average brain for combining data across patients (i.e., “group analyses”). FreeSurfer maps individual brains to its average brain by aligning their gyrification patterns. This mapping thus accurately preserves the gyral location of subdural electrodes at the cost of greatly distorting some inter-electrode distances (Figure 3).

As described in Dykstra et al. (2012), iELVis maps subdural electrode locations from a patient’s brain to the average brain by first assigning each electrode to the closest point on the patient’s pial surface (after the leptomeningeal surface-based brain shift correction described above). The pial surface is warped to a sphere which FreeSurfer has gyally aligned to a spherical version of its average brain’s pial surface (Fischl et al., 1999). Each point on the patient’s spherical surface is assigned to the nearest neighbor on the average brain spherical surface, which has a one-to-one vertex correspondence to the average brain pial surface.

By default, penetrating depth electrodes are mapped to the FreeSurfer average brain via an affine transformation to MNI305 space, which is compatible with that of the FreeSurfer average brain. However, penetrating electrodes within deep structures such as the amygdala and hippocampus might be best grouped across patients by using volumetric anatomical atlases (see following section). Depth electrode contacts that lie in cerebral grey matter can be mapped to the average brain via surface based mapping if users manually edit the iELVis electrode location files to indicate that the contact is a subdural electrode instead of a depth electrode.

### 4. CATEGORIZING ELECTRODES USING ANATOMICAL ATLASES

In addition to mapping individual brains to standard spaces, it is often useful to map them to standard anatomical atlases. Anatomical atlases can be used to define regions of interest to select subsets of electrodes for analysis or to combine data across patients for group analyses (e.g., Groppe et al., 2013). Pooling data across brains can be especially useful for iEEG/iEBS research which typically employs a very limited number of patients with idiosyncratic electrode placement.

iELVis currently supports five FreeSurfer based anatomical atlases, four cortical and one volumetric. Two of these, the Desikan-Killiany and Destrieux atlases (Desikan et al., 2006; Destrieux, Fischl, Dale, & Halgren, 2010), are based on the major gyri and sulci. The Desikan-Killiany atlas (Figure 4: A) divides the cortical surface into 35 areas, while the Destrieux atlas has a finer grained 75 area parcellation (Figure 4: B). These atlases are particularly useful for functional areas that largely follow gyrification patterns (e.g., primary motor and sensory cortex, Broca’s area). The other two cortical atlases are derived from resting



state fMRI functional networks (Yeo et al., 2011). More specifically, Yeo and colleagues collected resting state fMRI data from 1000 neurotypical, young adults and grouped together cortical areas with high functional connectivity. They found two well-formed groupings of areas consisting of 7 and 17 networks (Figure 4: C-D). The 7-network atlas consists of the following groupings: default mode, frontoparietal, somatomotor, dorsal attention, ventral attention, limbic, and visual. These networks are somewhat broken up into the more fine-grained groupings of the 17-network atlas. For example, the 7-network atlas somatomotor network divides into dorsal and ventral somatomotor areas around the boundary of hand and face sensorimotor cortex.

The volumetric atlas labels 44 subcortical areas, including the amygdala, hippocampus, and white matter (Figure 4: E). In addition, cortical voxels are labelled according to the Desikan-Killiany atlas. As mentioned previously, depth electrode contacts that lie in cortical grey matter can be manually relabeled as subdural contacts. This will allow them to be localized using the higher resolution surface based atlases with iELVis.

## 5. MULTIMODAL OVERLAYS

Multiple modalities of brain mapping data are often acquired from the same epilepsy surgery candidate. iELVis supports the simultaneous visualization of many of these data types. Specifically, it can visualize neuroimaging data (e.g., BOLD activation or cortical thickness), single contact electrode data (e.g. power changes), and bipolar contact electrode data (e.g. bipolar stimulation effects). Figure 5 displays an example of this. Specifically, it shows the overlay of three methods of mapping hand sensorimotor cortex: fMRI, iEEG, and iEBS. In addition, the iEEG and iEBS data are overlaid on the Yeo-17 area atlas to illustrate how well the Yeo et al. anatomically based functional networks compare with the patient's functional mapping. All three functional mapping methods are in strong agreement (Figure 5: left and middle columns). The peak and boundaries of the fMRI statistical map are tightly consistent with that of the iEEG activations. The iEBS mapping is also highly consistent with the other two modalities, however it appears that iEBS includes an electrode that is a bit ventral and anterior of hand sensorimotor cortex because it was paired with another electrode placed squarely over hand sensorimotor cortex during stimulation.

Note that the Yeo-17 network dorsal somatomotor area nicely captures the ventral boundary of hand somatomotor cortex (Figure 5: right column). However, the atlas area extends far beyond the dorsal boundary of the hand region and likely includes other somatomotor regions (e.g., arm and leg).

Finally, note that the unconventional visualization of electrode data on the inflated pial surface (Figure 5: left column) makes it possible to relate electrode data to sulcal neuroimaging data and, potentially, to visualize penetrating depth

electrodes that lie in sulcal grey matter. This is useful not only because most of the cortical surface is sulcal (Valiante, 2012) and often obscured in standard iEEG visualizations, but also because the inflated surface provides a better sense of the surface-based distance (as opposed to Euclidean) between electrodes. This could be very helpful for understanding the spread of cortical activity such as seizures (Jenssen, et al., 2011; Schevon et al., 2012) or how functional interactions between cortical areas varies as a function of distance (Keller, Bickel et al., 2011).

## 6. DISCUSSION

Despite the increasing importance and popularity of iEEG and iEBS research, public software tools for dealing with some of the unique technical challenges of this work are limited. With the iELVis toolbox, we have addressed the need for an open source, well-documented software package that solves many common iEEG/iEBS technical challenges. iELVis provides a family of MATLAB functions for identifying the anatomical locations of electrodes with mm-scale resolution, for surface-based mapping of electrode locations to an average brain for group analyses, for mapping electrode locations to five anatomical atlases, and for simultaneously, interactively visualizing electrode and neuroimaging data. The toolbox works on all major operating systems, is well-documented, includes well-developed tutorial materials, and is easy to integrate with other popular neuroscience freeware packages such as EEGLAB (Delorme & Makeig, 2004; Delorme et al., 2011), FieldTrip (Oostenveld, Fries, Maris, & Schoffelen, 2011), and SPM (<http://www.fil.ion.ucl.ac.uk/spm/>).

While the iELVis toolbox meets the typical, basic localization needs of iEEG/iEBS research, the current version of the toolbox has some shortcomings. In particular, an issue with the surface based mapping to the average brain is that small differences in electrode locations in the patient's native space can result in large differences in average brain coordinates if an electrode lies near gyral borders (e.g., near the boundary between the temporal and frontal lobes). Similarly, small differences in electrode locations can affect the anatomical region assigned to electrodes that lie near the borders of different atlas regions. A simplistic way to deal with this would be to remove these boundary electrodes from group analyses since their anatomical location is uncertain. Alternatively, subdural electrode data may be spatially smeared across nearby cortical vertices to account for the uncertainty of electrode locations (Kadipasaoglu et al., 2014; Kubanek & Schalk, 2015). A complication with this approach is that it is unclear what the smearing kernel should be and such smearing fails to deal with volume conduction. The best alternative may be to localize the neural sources of the electrode data (Akalin Acar, et al., 2011) and to map those data to the average brain or atlases. This method could remove the need for a somewhat arbitrary smoothing kernel and would account for volume conduction. In particular, it could identify sulcal activity that likely contributes to subdural iEEG/iEBS data (Towle,



Carder, Khorasani, & Lindberg, 1999).

An additional shortcoming of iELVis is that it does not implement any method for correcting depth electrodes for postimplant brain shift when the depth electrodes are implanted along with subdural electrodes that require a craniotomy. As already mentioned, the degree of brain shift near depth contacts is typically minor given that they are anchored to the skull and are usually distant from the craniotomies that produce the most significant brain shift. However, it would be useful to have tools for depth electrode brain-shift correction as sometimes depth electrodes lie near the craniotomy and if brain shift is severe it may affect even deep structures. A more significant limitation is that the automatic FreeSurfer pial surface construction, which iELVis depends on, often fails near abnormal brain regions (e.g., tumors or previous resections) and typically underestimates the medial extent of the medial temporal pial surface. The pial surface can potentially be manually corrected in FreeSurfer, however it may be that alternative surface based electrode localization algorithms (Hermes, Miller, Noordmans, Vansteensel, & Ramsey, 2010) might be more effective in cases of significant failure.

In the future, we plan to develop iELVis further to address some of these limitations and to add new functionality. For example, we aim to quantify the degree of confidence that an electrode can be assigned to a particular anatomical region in order to identify electrodes whose anatomical locus is in doubt. Moreover, we hope to make it possible to spatially smooth electrode data over the cortical surface or to localize the neural generators of iEEG data in order to improve group analyses. Finally, we hope to add compatibility with additional brain atlases such as probabilistic maps of visual areas (L. Wang, Mruczek, Arcaro, & Kastner, 2015b) and individual-data derived resting-state fMRI network parcellations (Fox et al., 2016; D. Wang et al., 2015a). We also welcome contributions from other iEEG/iEBS researchers and have established a users group and contribution guidelines to facilitate this (<http://episurg.pbworks.com>).

## **ACKNOWLEDGMENTS:**

We thank the patients for consenting to provide the data that made this toolbox possible. Moreover, we thank Miklos Argyelan, Kathrin Müsch, Taufik Valiante, and Jaime Gomez for helping to debug and to develop this software. This work was supported by the Swiss National Science Foundation (grants PBGEP3\_139829 and P300P3\_148388 to PM), the Page and Otto Marx Jr. Foundation (to ADM), and by the Natural Sciences and Engineering Research Council of Canada (RGPIN-2014-04465 to CJH).

## REFERENCES:

- Akalin Acar, Z., Palmer, J., Worrell, G., & Makeig, S. (2011). Electrocortical source imaging of intracranial EEG data in epilepsy. *Engineering in Medicine and Biology Society, EMBC, 2011 Annual International Conference of the IEEE*, 1411–1414.
- Crone, N. E., Korzeniewska, A., & Franaszczuk, P. J. (2011). Cortical gamma responses: Searching high and low. *International Journal of Psychophysiology*, 79(1), 9–15. <http://doi.org/10.1016/j.ijpsycho.2010.10.013>
- Dalal, S. S., Edwards, E., Kirsch, H. E., Barbaro, N. M., Knight, R. T., & Nagarajan, S. S. (2008). Localization of neurosurgically implanted electrodes via photograph–MRI–radiograph coregistration. *Journal of Neuroscience Methods*, 174(1), 106–115. <http://doi.org/10.1016/j.jneumeth.2008.06.028>
- Delorme, A., & Makeig, S. (2004). EEGLAB: an open source toolbox for analysis of single-trial EEG dynamics including independent component analysis. *Journal of Neuroscience Methods*, 134(1), 9–21. <http://doi.org/10.1016/j.jneumeth.2003.10.009>
- Delorme, A., Mullen, T., Kothe, C., Akalin Acar, Z., Bigdely-Shamlo, N., Vankov, A., & Makeig, S. (2011). EEGLAB, SIFT, NFT, BCILAB, and ERICA: New Tools for Advanced EEG Processing. *Computational Intelligence and Neuroscience*, 2011(1), 1–12. <http://doi.org/10.1162/pres.19.1.35>
- Desikan, R. S., Ségonne, F., Fischl, B., Quinn, B. T., Dickerson, B. C., Blacker, D., et al. (2006). An automated labeling system for subdividing the human cerebral cortex on MRI scans into gyral based regions of interest. *NeuroImage*, 31(3), 968–980. <http://doi.org/10.1016/j.neuroimage.2006.01.021>
- Destrieux, C., Fischl, B., Dale, A., & Halgren, E. (2010). Automatic parcellation of human cortical gyri and sulci using standard anatomical nomenclature. *NeuroImage*, 53(1), 1–15. <http://doi.org/10.1016/j.neuroimage.2010.06.010>
- Dykstra, A. R., Chan, A. M., Quinn, B. T., Zepeda, R., Keller, C. J., Cormier, J., et al. (2011). Individualized localization and cortical surface-based registration of intracranial electrodes. *NeuroImage*, 1–42. <http://doi.org/10.1016/j.neuroimage.2011.11.046>
- Fischl, B., Sereno, M. I., Tootell, R. B. H., & Dale, A. M. (1999). High-resolution intersubject averaging and a coordinate system for the cortical surface. *Human Brain Mapping*, 8(4), 272–284.
- Fox, M. D., Qian, T., Madsen, J. R., Wang, D., Li, M., Ge, M., et al. (2016). Combining task-evoked and spontaneous activity to improve pre-operative brain mapping with fMRI. *NeuroImage*, 124(Part A), 714–723. <http://doi.org/10.1016/j.neuroimage.2015.09.030>
- Golumbic, E. Z., Ding, N., Bickel, S., Lakatos, P., Schevon, C. A., McKhann, G. M., Goodman, R. R., Emerson, R., Mehta, A. D., Simon, J. Z., Poeppel, D., & Schroeder, C. (2013). Mechanisms underlying selective neuronal tracking of attended speech at a “cocktail party.” *Neuron*, 77(5), 980–991.

- Gonzalez-Martinez, J., Mullin, J., Vadera, S., Bulacio, J., Hughes, G., Jones, S., et al. (2014). Stereotactic placement of depth electrodes in medically intractable epilepsy. *Journal of Neurosurgery*, 120(3), 639–644. <http://doi.org/10.3171/2013.11.JNS13635>
- Greve, D. N., & Fischl, B. (2009). Accurate and robust brain image alignment using boundary-based registration. *NeuroImage*, 48(1), 63–72. <http://doi.org/10.1016/j.neuroimage.2009.06.060>
- Groppe, D. M., Bickel, S., Keller, C. J., Jain, S. K., Hwang, S. T., Harden, C., & Mehta, A. D. (2013). Dominant frequencies of resting human brain activity as measured by the electrocorticogram. *NeuroImage*, 79(C), 1–11. <http://doi.org/10.1016/j.neuroimage.2013.04.044>
- Hastreiter, P., Rezk-Salama, C., Soza, G., Bauer, M., Greiner, G., Fahlbusch, R., et al. (2004). Strategies for brain shift evaluation. *Medical Image Analysis*, 8(4), 447–464. <http://doi.org/10.1016/j.media.2004.02.001>
- Hermes, D., Miller, K. J., Noordmans, H. J., Vansteensel, M. J., & Ramsey, N. F. (2010). Automated electrocorticographic electrode localization on individually rendered brain surfaces. *Journal of Neuroscience Methods*, 185(2), 293–298. <http://doi.org/10.1016/j.jneumeth.2009.10.005>
- Hill, D., Smith, A. C., & Simmons, A. (2000). Sources of error in comparing functional magnetic resonance imaging and invasive electrophysiological recordings. *Journal of Neurosurgery*, 93(2), 214–233.
- Jenkinson, M., & Smith, S. (2001). A global optimisation method for robust affine registration of brain images. *Medical Image Analysis*, 5(2), 143–156. [http://doi.org/10.1016/S1361-8415\(01\)00036-6](http://doi.org/10.1016/S1361-8415(01)00036-6)
- Jenkinson, M., Bannister, P., Brady, M., & Smith, S. (2002). Improved Optimization for the Robust and Accurate Linear Registration and Motion Correction of Brain Images. *NeuroImage*, 17(2), 825–841. <http://doi.org/10.1006/nimg.2002.1132>
- Jenssen, S., Roberts, C. M., Gracely, E. J., Dlugos, D. J., & Sperling, M. R. (2011). Focal seizure propagation in the intracranial EEG. *Epilepsy Research*, 93(1), 25–32. <http://doi.org/10.1016/j.eplepsyres.2010.10.008>
- Kadipasaoglu, C. M., Baboyan, V. G., Conner, C. R., Chen, G., Saad, Z. S., & Tandon, N. (2014). Surface-based mixed effects multilevel analysis of grouped human electrocorticography. *NeuroImage*, 101(C), 215–224. <http://doi.org/10.1016/j.neuroimage.2014.07.006>
- Keller, C. J., Bickel, S., Entz, L., Ulbert, I., Milham, M. P., Kelly, C., & Mehta, A. D. (2011). Intrinsic functional architecture predicts electrically evoked responses in the human brain. *Proceedings of the National Academy of Sciences*, 108(25), 10308–10313.
- Kubanek, J., & Schalk, G. (2015). NeuralAct: a tool to visualize electrocortical (ECoG) activity on a three-dimensional model of the cortex. *Neuroinformatics*, 13(2), 167–174.
- Mégevand, P., Groppe, D. M., Goldfinger, M. S., Hwang, S. T., Kingsley, P. B., Davidesco, I., & Mehta, A. D. (2014). Seeing scenes: Topographic visual hallucinations evoked by direct electrical stimulation of the parahippocampal

- place area. *Journal of Neuroscience*, 34(16), 5399–5405.  
<http://doi.org/10.1523/JNEUROSCI.5202-13.2014>
- Miller, K. J., Sorensen, L. B., Ojemann, J. G., & Nijs, den, M. (2009). Power-law scaling in the brain surface electric potential. *PLoS Computational Biology*, 5(12), e1000609. <http://doi.org/10.1371/journal.pcbi.1000609.g005>
- Oostenveld, R., Fries, P., Maris, E., & Schoffelen, J.-M. (2011). FieldTrip: Open source software for advanced analysis of MEG, EEG, and invasive electrophysiological data. *Computational Intelligence and Neuroscience*, 2011(1), 1–9. <http://doi.org/10.1016/j.neuroimage.2009.02.041>
- Papademetris, X., Jackowski, M., & Rajeevan, N. (2011). BioImage Suite: An integrated medical image analysis suite. *Section of Bioimaging Sciences, Department of Diagnostic Radiology, Yale School of Medicine*.
- Parvizi, J., Jacques, C., Foster, B. L., Withoft, N., Rangarajan, V., Weiner, K. S., & Grill-Spector, K. (2012). Electrical stimulation of human fusiform face-selective regions distorts face perception. *Journal of Neuroscience*, 32(43), 14915–14920. <http://doi.org/10.1523/JNEUROSCI.2609-12.2012>
- Penfield, W., & Jasper, H. H. (1954). *Epilepsy and the Functional Anatomy of the Human Brain* (1st ed.). Boston: Little, Brown.
- Schaer, M., Cuadra, M. B., Tamarit, L., Lazeyras, F., Eliez, S., & Thiran, J. P. (2008). A surface-based approach to quantify local cortical gyrification. *IEEE Transactions on Medical Imaging*, 27(2), 161–170.  
<http://doi.org/10.1109/TMI.2007.903576>
- Schevon, C. A., Weiss, S. A., McKhann, G., Goodman, R. R., Yuste, R., Emerson, R. G., & Trevelyan, A. J. (2012). Evidence of an inhibitory restraint of seizure activity in humans. *Nature Communications*, 3, 1060–11.  
<http://doi.org/10.1038/ncomms2056>
- Suthana, N., Haneef, Z., Stern, J., Mukamel, R., Behnke, E., Knowlton, B., & Fried, I. (2012). Memory enhancement and deep-brain stimulation of the entorhinal area. *New England Journal of Medicine*, 366(6), 502-510.
- Sweet, J. A., Hdeib, A. M., Sloan, A., & Miller, J. P. (2013). Depths and grids in brain tumors: Implantation strategies, techniques, and complications. *Epilepsia*, 54, 66–71. <http://doi.org/10.1111/epi.12447>
- Towle, V. L., Carder, R. K., Khorasani, L., & Lindberg, D. (1999). Electrocorticographic coherence patterns. *Journal of Clinical Neurophysiology*, 16(6), 528.
- Valiante, T. A. (2011). Neuroanatomy as applicable to epilepsy: Gross and macroscopic anatomy/histology. In I. Osorio, H. P. Zaveri, M. G. Frei, & S. Arthurs (Eds.), *Epilepsy: The intersection of neurosciences, biology, mathematics, engineering, and physics* (pp. 3–22). CRC press
- Wang, D., Buckner, R. L., Fox, M. D., Holt, D. J., Holmes, A. J., Stoecklein, S., et al. (2015a). Parcellating cortical functional networks in individuals. *Nature*, 18(12), 1853–1860. <http://doi.org/10.1038/nn.4164>
- Wang, L., Mruczek, R. E. B., Arcaro, M. J., & Kastner, S. (2015b). Probabilistic maps of visual topography in human cortex. *Cerebral Cortex*, 25(10), 3911–3931. <http://doi.org/10.1093/cercor/bhu277>
- Yang, A. I., Wang, X., Doyle, W. K., Halgren, E., Carlson, C., Belcher, T. L., et al.

- (2012). Localization of dense intracranial electrode arrays using magnetic resonance imaging. *NeuroImage*, 63(1), 157–165.  
<http://doi.org/10.1016/j.neuroimage.2012.06.039>
- Yeo, B. T., Krienen, F. M., Sepulcre, J., Sabuncu, M. R., Lashkari, D., Hollinshead, M., et al. (2011). The organization of the human cerebral cortex estimated by intrinsic functional connectivity. *Journal of Neurophysiology*, 106(3), 1125–1165. <http://doi.org/10.1152/jn.00338.2011>

| Package        | URL                                                                                               | Platform                                                                                           | Dependencies                                                                                                                           | Functionality                                                                                                                                                                                                                                                                                                                                                                                                                                                      |
|----------------|---------------------------------------------------------------------------------------------------|----------------------------------------------------------------------------------------------------|----------------------------------------------------------------------------------------------------------------------------------------|--------------------------------------------------------------------------------------------------------------------------------------------------------------------------------------------------------------------------------------------------------------------------------------------------------------------------------------------------------------------------------------------------------------------------------------------------------------------|
| Biolmage Suite | <a href="http://bioimagesuite.yale.edu/">http://bioimagesuite.yale.edu/</a>                       | Windows, OS X, Linux                                                                               | None                                                                                                                                   | <ul style="list-style-type: none"> <li>• GUIs for manual electrode localization and annotation</li> <li>• Postimplant CT/MRI to preimplant MRI/fMRI coregistration</li> <li>• Can simultaneously visualize neuroimaging and intracranial electrode data</li> </ul>                                                                                                                                                                                                 |
| BrainMapper    | <a href="https://github.com/vkrish1/brainmapperApp">https://github.com/vkrish1/brainmapperApp</a> | OS X                                                                                               | None                                                                                                                                   | <ul style="list-style-type: none"> <li>• Postimplant CT to preimplant/postimplant MRI coregistration</li> <li>• Correction for brain shift</li> <li>• Maps electrode locations to a cortical atlas</li> </ul>                                                                                                                                                                                                                                                      |
| eConnectome    | <a href="http://econnectome.umn.edu/">http://econnectome.umn.edu/</a>                             | MATLAB (Windows, OS X, Linux)                                                                      | None                                                                                                                                   | <ul style="list-style-type: none"> <li>• Visualizes subdural electrode univariate and bivariate data overlaid on the brain's surface</li> </ul>                                                                                                                                                                                                                                                                                                                    |
| FieldTrip      | <a href="http://www.fieldtriptoolbox.org/">http://www.fieldtriptoolbox.org/</a>                   | MATLAB (Windows, OS X, Linux)                                                                      | None                                                                                                                                   | <ul style="list-style-type: none"> <li>• GUI for manual localization of electrodes in intraoperative photographs</li> </ul>                                                                                                                                                                                                                                                                                                                                        |
| iELVis         | <a href="https://github.com/epiSurg/EpiSurg">https://github.com/epiSurg/EpiSurg</a>               | MATLAB (Windows, OS X, Linux) with some Bash scripts for neuroimaging coregistration (OS X, Linux) | Relies on FreeSurfer for T1 MRI segmentation and cortical surface reconstruction. Relies on Biolmage Suite for electrode localization. | <ul style="list-style-type: none"> <li>• Postimplant CT/MRI to preimplant MRI/fMRI coregistration</li> <li>• Implements Yang, Wang et al. (2012) and Dykstra et al. (2012) methods for brain shift correction</li> <li>• Maps electrodes to the FreeSurfer average brain for group analyses</li> <li>• Maps electrodes to five FreeSurfer based anatomical atlases</li> <li>• Can simultaneously visualize neuroimaging and intracranial electrode data</li> </ul> |



|         |                                                                                                       |                                     |                                                                                   |                                                                                                                                                                                              |
|---------|-------------------------------------------------------------------------------------------------------|-------------------------------------|-----------------------------------------------------------------------------------|----------------------------------------------------------------------------------------------------------------------------------------------------------------------------------------------|
| moviEEG | <a href="https://github.com/dtqe/moviEEG">https://github.com/dtqe/moviEEG</a>                         | MATLAB<br>(Windows,<br>OS X, Linux) | None                                                                              | <ul style="list-style-type: none"> <li>Visualizes subdural electrode univariate and bivariate data overlaid on the brain's surface</li> </ul>                                                |
| Ntools  | <a href="https://github.com/HughWXY/nTools_elec-BETA">https://github.com/HughWXY/nTools_elec-BETA</a> | MATLAB<br>(Windows,<br>OS X, Linux) | Relies on FreeSurfer for T1 MRI segmentation and cortical surface reconstruction. | <ul style="list-style-type: none"> <li>Implements Yang, Wang et al. (2012) method for brain shift correction</li> <li>Maps electrodes to the MNI average brain for group analyses</li> </ul> |

Table 1: Some existing software packages that support intracranial electrode localization or visualization.

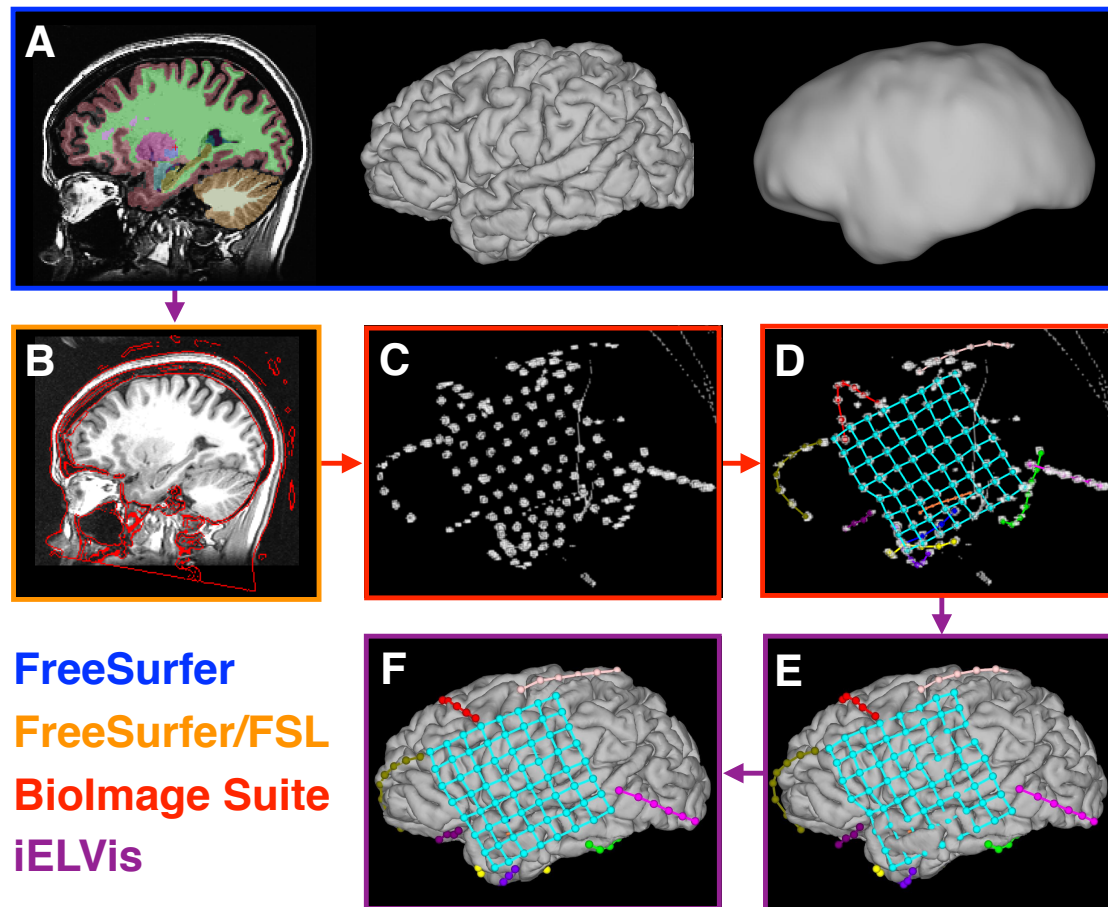

**Figure 1: Electrode localization workflow.** [A] FreeSurfer automatically segments various anatomical regions from a preimplant T1 MRI. This produces a 3D labeling of brain structures such as white matter, hippocampus, and pars opercularis which are represented with different colors [A-left]. In addition, FreeSurfer constructs pial [A-middle] and leptomeningeal [A-right] surfaces. [B] A postimplant CT scan is rigidly coregistered to a preimplant T1 MRI. Edges of the CT scan are overlaid as red lines on the T1 MRI. [C] Electrodes are clearly apparent in the CT scan, visualized in 3D via BioImage Suite. [D] Electrode locations are manually labeled using BioImage Suite. Each strip, grid, or shaft of electrodes is represented with a unique color. [E] Electrode locations on the FreeSurfer reconstructed pial surface visualized with iELVis functions in MATLAB. Some cyan grid electrodes appear to lie inside the temporal lobe, due to postimplant brain compression (“brain shift”). [F] Brain shift-corrected electrode locations on the FreeSurfer pial surface visualized with iELVis functions in MATLAB.

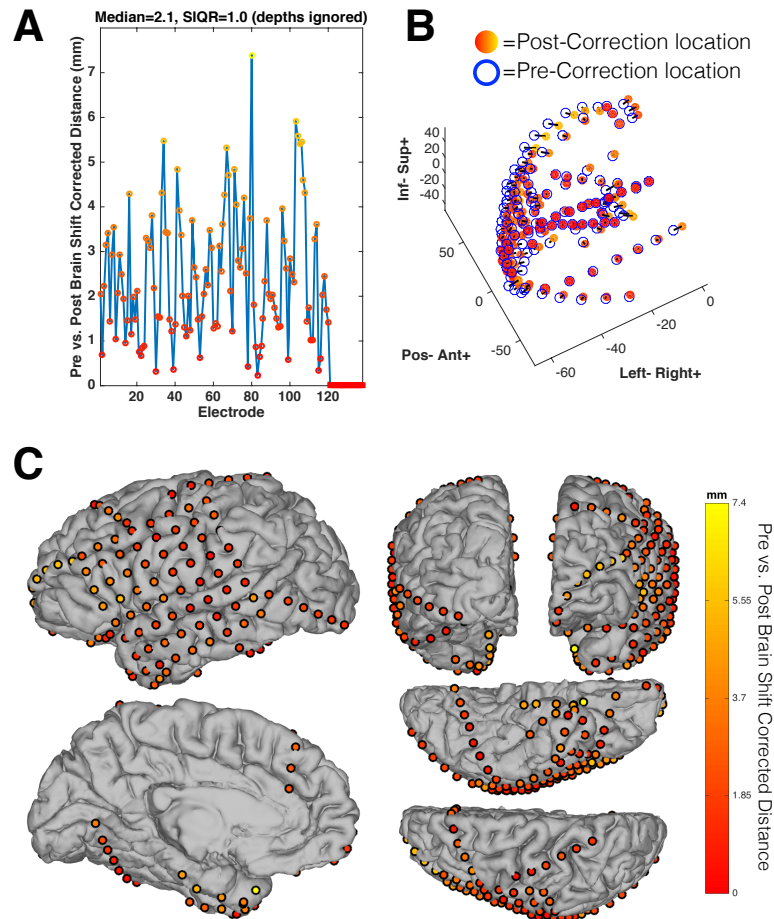

**Figure 2: iELVis visualizations to check brain shift correction accuracy.** [A] The distance between electrode locations before and after brain shift correction. Subdural electrodes (circles) are corrected for brain shift, while depth electrodes (squares) are not; the correction distance for depth electrodes is therefore zero. Color scale corresponds to the plot in C. [B] Electrode locations pre- and post-correction for brain shift; lines join pre- and post-correction locations of each electrode. Post-correction electrodes use the same color scale as the plot in C. [C] Electrode locations overlaid on the subject's pial surface, after brain shift correction, color coded to reflect the correction distances in A. In all figures, clicking on electrode symbols will produce the corresponding electrode's name. The three dimensional figures can be interactively rotated.

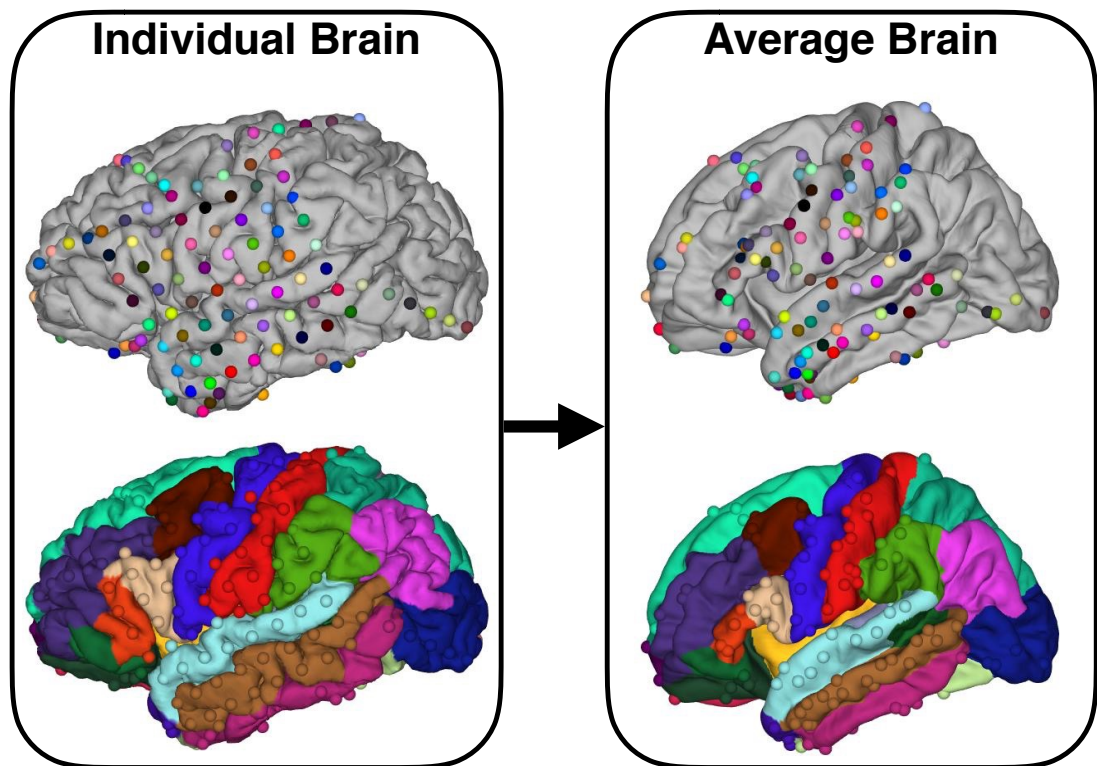

**Figure 3: Mapping from individual anatomy to the FreeSurfer average brain preserves gyral location.** [Left-Top] Electrodes on an individual's pial surface are colored uniquely. [Left-Bottom] The individual brain is colored according cortical areas as defined by FreeSurfer's Desikan-Killiany atlas. Electrodes are colored to match that of the closest brain region. [Right] Analogous electrode locations on the FreeSurfer average brain with the same color codes used for the individual brain. Mapping to the average brain preserves the gyral location of each electrode.

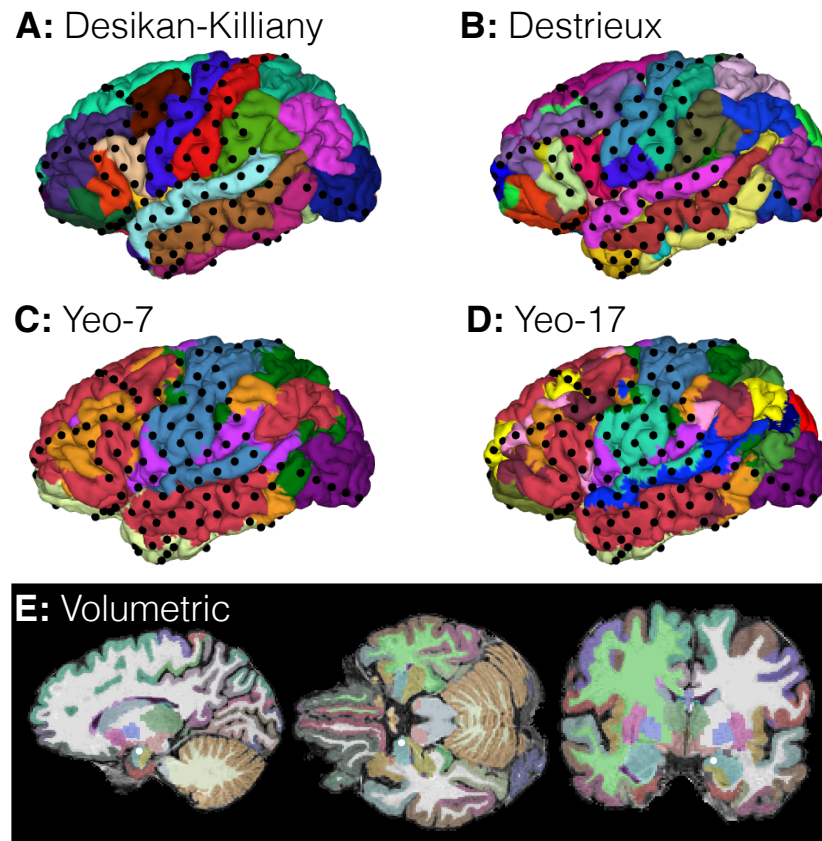

**Figure 4: FreeSurfer anatomical atlases supported by iELVis.** [A] Desikan-Killiany 35 area cortical atlas based on gyrification. [B] Destrieux 75 area cortical atlas based on gyrification. [C] Yeo 7 and [D] 17 area cortical atlas derived from resting state functional networks. [E] Volumetric atlas that includes subcortical as well as Desikan-Killiany cortical areas. Electrode locations are represented with black spheres (A-D) or white circles (E).



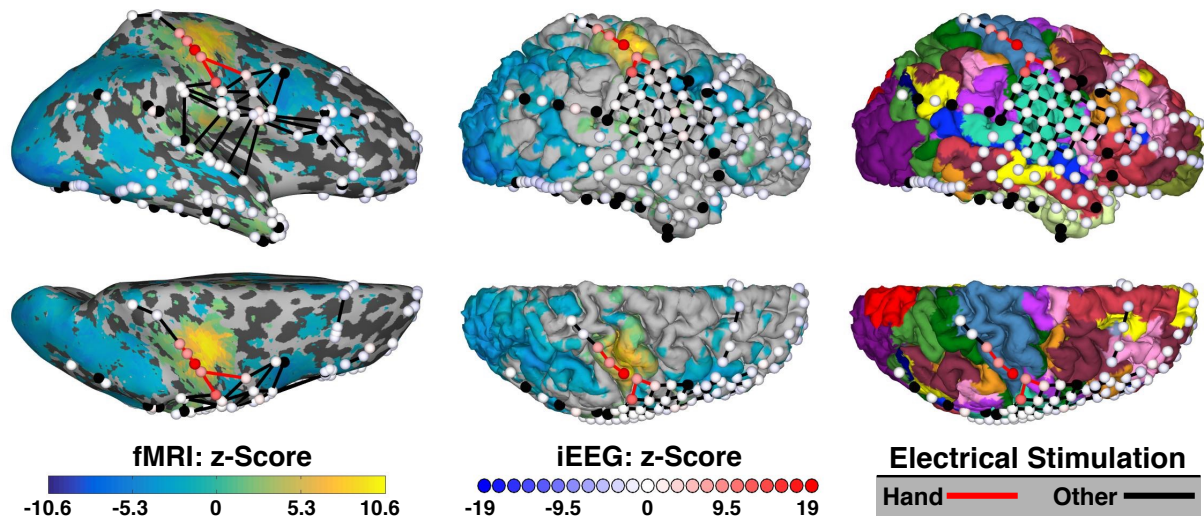

**Figure 5: Using iELVis to visualize localization of hand sensorimotor cortex using multiple modalities: fMRI, iEEG and iEBS.** Maps are visualized on the inflated (left column) and non-inflated (middle and right columns) pial surface. For the inflated pial surface, gyri and sulci are represented with light and dark grey, respectively. **[fMRI Data]** Parula (i.e., blue-green-yellow) color scale represents an fMRI statistical map with positive values indicating greater BOLD response during finger tapping versus rest. **[iEEG Data]** Blue-red color scale represents an ECoG statistical map with positive values indicating greater high gamma band power during finger tapping versus rest. Spheres represent electrode locations. Black spheres indicate that an electrode provided no usable data. **[iEBS Data]** Red lines between electrodes indicate pairs of electrodes that produced hand movement or sensation when electrically stimulated. Black lines indicate that either no response or a non-hand sensorimotor response was elicited when the connected electrodes were stimulated. **[Yeo-17 Atlas]** Right column indicates the boundaries of various resting state functional networks according to FreeSurfer's Yeo et al. 17 area atlas.
